# DAMEfinder: A method to detect differential allele-specific methylation

Stephany Orjuela<sup>1,2</sup>, Dania Machlab<sup>3</sup>, Mirco Menigatti<sup>2</sup>,  
Giancarlo Marra<sup>2</sup>, Mark D. Robinson<sup>1,\*</sup>

<sup>1</sup>Institute of Molecular Life Sciences and  
SIB Swiss Institute of Bioinformatics, University of Zurich, Switzerland  
<sup>2</sup>Institute of Molecular Cancer Research, University of Zurich, Switzerland  
<sup>3</sup>Friedrich Miescher Institute for Biomedical Research, Basel, Switzerland

\*Corresponding author

October 15, 2019

## 1 Abstract

2 DNA methylation is a highly studied epigenetic signature that is associated with regulation  
3 of gene expression, whereby genes with high levels of promoter methylation are generally  
4 repressed. Genomic imprinting occurs when one of the parental alleles is methylated, i.e.,  
5 when there is inherited allele-specific methylation (ASM). A special case of imprinting occurs  
6 during X chromosome inactivation in females, where one of the two X chromosomes is silenced,  
7 in order to achieve dosage compensation between the sexes. Another more widespread form  
8 of ASM is sequence dependent (SD-ASM), where ASM is linked to a nearby heterozygous  
9 single nucleotide polymorphism (SNP).

10 We developed a method to screen for genomic regions that exhibit loss or gain of ASM in  
11 samples from two conditions (treatments, diseases, etc.). The method relies on the availability  
12 of bisulfite sequencing data from multiple samples of the two conditions. We leverage other  
13 established computational methods to screen for these regions within a new R package called  
14 DAMEfinder. It calculates an ASM score for all CpG sites or pairs in the genome of each  
15 sample, and then quantifies the change in ASM between conditions. It then clusters nearby  
16 CpG sites with consistent change into regions.

17 In the absence of SNP information, our method relies only on reads to quantify ASM.  
18 This novel ASM score compares favourably to current methods that also screen for ASM. Not  
19 only does it easily discern between imprinted and non-imprinted regions, but also females  
20 from males based on X chromosome inactivation. We also applied DAMEfinder to a colorectal  
21 cancer dataset and observed that colorectal cancer subtypes are distinguishable according to  
22 their ASM signature. We also re-discover known cases of loss of imprinting.

23 We have designed DAMEfinder to detect regions of differential ASM (DAMEs), which  
24 is a more refined definition of differential methylation, and can therefore help in breaking  
25 down the complexity of DNA methylation and its influence in development and disease.

## 26 Background

27 Epigenetic modifications refer to mitotically-heritable, chemical variations in DNA and  
28 chromatin in the absence of changes in the DNA nucleotide sequence itself [1, 2]. Although  
29 there are a large number of such documented phenomena, DNA methylation (i.e., methyl  
30 groups added to cytosines in mammalian DNA, mostly in CpGs dinucleotides) stands out  
31 because the mechanism of heritability, via maintenance methyltransferases, is well-determined  
32 [3–5]. In addition, due to well-known effects of chemical reactions, such as sodium bisulfite  
33 conversion of cytosines to uracils [6], and biochemical reactions like TET-pyridine borane  
34 conversion of 5-methylcytosine to dihydrouracil [7], the interrogation of DNA methylation  
35 level across the genome can be sampled and quantified at each cytosine.

36 DNA methylation plays a role in several biological phenomena. It is believed to be  
37 associated with gene expression, with the canonical relationship suggesting that transcriptional  
38 units with high levels of promoter methylation are repressed or silenced, although not all  
39 genes with unmethylated promoters are switched on, since other epigenetic mechanisms of  
40 silencing may come into play [8].

41 Genomic imprinting, where genes are expressed in a parent-of-origin manner [9], is also  
42 regulated by DNA methylation. Imprinting occurs via allele-specific methylation (ASM),  
43 in which only the paternal or the maternal allele is methylated in all or most of the tissues  
44 of an individual [9]. This methylation asymmetry is conferred during gametogenesis in the  
45 parental germlines, or during early embryogenesis after fertilization, and will remain during

46 the lifetime of the offspring [10]. A recent survey [11] reported 228 genes linked to imprinted  
47 control, and from those, 115 linked to imprinted regulation in human placenta. These genes  
48 are known for their roles in embryonic and fetal development, placental formation, cell growth  
49 and differentiation, metabolism and circadian clock regulation [11]. In fact, loss of imprinting  
50 and abnormal expression of imprinted genes are implicated in severe congenital diseases, like  
51 the neurodevelopment disorders Angelman and Prader-Willi syndromes. The first is caused  
52 by the lack of maternal *UBE3A* gene expression, the second by loss of paternal expression  
53 of several contiguous genes on chromosome 15q11-q13 [12]. Furthermore, disruption of  
54 imprinting in somatic cells has been implicated in the pathogenesis of different cancers, like  
55 loss of imprinting within the *H19/IGF2* imprinting control region in colorectal cancer [13],  
56 and gain of imprinting at 11p15 in hepatocellular carcinoma [14].

57 A special and well characterized case of imprinting occurs during X chromosome  
58 inactivation (XCI), where one of the two X chromosomes is randomly silenced via DNA  
59 methylation and other epigenetic mechanisms, early in development in each cell of a female,  
60 in order to achieve dosage compensation between the sexes [15].

61 Beside imprinting and XCI, the rest of the genome is thought to be symmetrically  
62 methylated across both alleles. However, sequence-dependent ASM (SD-ASM) has been  
63 frequently reported in the last 10 years and appears to be widespread in the human genome  
64 [16–21]. In this case, the DNA methylation asymmetry between the parental alleles appears  
65 to be causally related to the presence of a single nucleotide polymorphism (SNP). As for  
66 imprinted ASM and XCI, SD-ASM can be associated with silencing of one of the two parental  
67 gene copies, likely mediated by cis-acting, allele-specific changes in affinity of DNA-binding  
68 proteins [21]. Thus, SD-ASM would explain why a large number of genes are differently  
69 expressed among individuals in a given cell type. SD-ASM appears to be also tissue-specific  
70 [22, 23], thus it is commonly believed that the interaction between genetic variants (i.e.,  
71 SNPs) and epigenetic mechanisms (i.e., effects of DNA methylation asymmetry on gene  
72 expression) modulates the susceptibility of the general population to frequent, multi-factorial  
73 diseases affecting specific organs, such as ASM in the *PEAR1* intron 1, which is linked to  
74 platelet reactivity and cardiovascular disease [24]; or ASM in *FKBP5* enhancers, which poses  
75 an increased risk to stress-related psychiatric disorders in individuals who suffered an abuse  
76 during childhood [25]. Although the modulation of the susceptibility to a complex disease by  
77 a SD-ASM is generally weak and influenced by environmental factors, it is worth noting that  
78 5-10% of all SNPs might be associated with SD-ASMs in the genome of a given tissue of a  
79 given individual [19, 20, 26].

80 Although there are several technologies to study DNA methylation, such as microarrays  
81 that genotype bisulfite-converted DNA, or lower resolution capture technologies such as  
82 methyl-binding domain (MBD) sequencing [27], or methylated DNA immunoprecipitation  
83 (MeDIP) sequencing [28], bisulfite sequencing (BS-seq) remains distinct for the ability to  
84 read out DNA methylation of a single allele at base-resolution. Importantly, BS-seq can be  
85 conducted both in an unbiased genome-wide fashion, or in combination with technologies  
86 that focus the sequencing to particular regions, either by making use of hybridization or  
87 enzyme digestions [29].

88 Recent studies have obtained ASM readouts from mapped bisulfite reads, by assigning  
89 them to the alleles of each known heterozygous SNP. Methylation levels are then determined  
90 for all allele-linked cytosines in the reads (see [20, 30, 31] for recent examples). The ASM  
91 calculated in this way is interpreted as SD-ASM, and it does not include imprinted ASM nor  
92 XCI, since they are not necessarily sequence dependent. Calculating ASM in this fashion is  
93 limited by the availability of SNP information from either DNA-seq or SNP-array data, or  
94 directly from the BS-seq reads [32]. However performing different types of high-throughput

95 experiments is economically restrictive and time consuming, and deriving SNPs from BS-seq  
96 reads can be problematic due to bisulfite conversion of DNA (i.e., distinguishing a C/T SNP  
97 from a C/T conversion of a methylated cytosine) and imbalanced strand coverage (i.e., when  
98 the Watson and Crick strands are not equally or highly covered) [32].

99 Considering these limitations in ASM detection, a couple of studies have sought to  
100 make sole use of BS-seq reads to screen for the full spectrum of ASM. The tools **allelicmeth**  
101 and **amrfinder** (from the same authors) [33] are the only available executable methods that  
102 detect ASM without SNP information. Briefly, the **allelicmeth** method creates a contingency  
103 table with the counts of methylated and unmethylated reads covering a pair of CpG sites.  
104 A score is calculated via Fisher’s exact test that represents the probability that both CpG  
105 sites have an equal proportion of methylated-unmethylated reads. **amrfinder** also calculates  
106 ASM but at a regional level. It fits two statistical models, one assuming that both alleles are  
107 equally methylated, and the other assuming different methylation states for the two alleles.  
108 A region is considered to have ASM by comparing the likelihoods of the two models. A  
109 more recent algorithm termed *MethylMosaic* relies on the principle that bimodal methylation  
110 patterns, independent from the genotype, are a good indicator of ASM [34]; however, to our  
111 knowledge there is no publicly available implementation.

112 Based on the current state of ASM detection from BS-seq reads, we set out to develop  
113 a simple yet effective method to screen for genomic regions that exhibit loss or gain of  
114 ASM between samples from distinct conditions. The methods mentioned above detect ASM  
115 in individual samples, however they do not allow a flexible comparison between groups of  
116 samples, such as that performed in a typical differential methylation analysis [35, 36], where  
117 the goal is to find the effect of treatments or diseases on methylation, reflected as increase  
118 or decrease of methylation levels. Here, we are interested in performing such differential  
119 analysis but focusing on the effect of ASM, reflected as gain or loss of allele-specificity. For  
120 this task, we introduce DAMEfinder (Differential Allele-specific MEthylation finder), an **R**  
121 package [37] that consists of: i. a scoring function that reflects ASM for several samples;  
122 ii. integration with **limma** [38] and **bumphunter** [39] to detect differentially allele-specific  
123 methylated regions (DAMEs); and, iii. accurate estimation of false discovery rates (FDR).  
124 We demonstrated the ASM score and DAMEfinder on two real data sets, one based on  
125 targeted-enrichment BS-seq, comparing normal colonic mucosa to cancerous colorectal lesions,  
126 and another on whole genome BS-seq (WGBS), comparing blood monocytes from healthy  
127 females and males.

## 128 Results

### 129 The overall DAMEfinder workflow

130 Figure 1 gives an overview of the pipeline. We make considerable use of existing tools and  
131 keep inputs/outputs in standard formats. In order to make use of the package, the user must  
132 independently use **bismark** to map paired-end BS-seq reads against a reference genome  
133 (Figure 1A). Once this is done, the user has the option to detect ASM for each sample in  
134 two ways: (1) Using the output from **methtuple** [40], which computes read counts of *pairs*  
135 of nearby CpG sites. From these counts, we compute an ASM score; and/or (2) using an  
136 additional VCF file containing heterozygous SNPs. For each SNP we call methylation from  
137 the reads containing that SNP, and calculate an ASM score for each CpG site (Figure 1B  
138 and details below). From the set of scores, we leverage routines from the **bumphunter** and  
139 **limma** packages to calculate a statistic and detect regions showing persistent change in ASM.

140 We call these regions DAMEs (Figure 1C). We estimate and control a regional FDR through  
 141 permutations or by implementation of the Simes method [41].

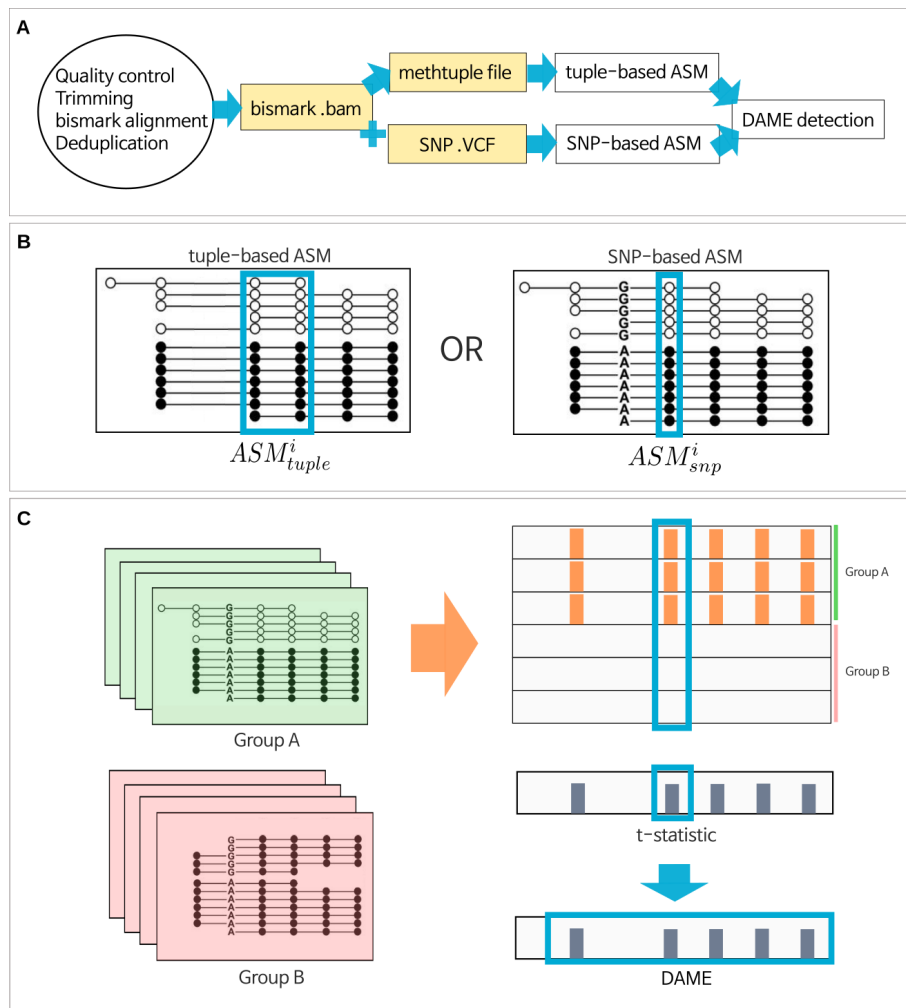

**Figure 1.** The DAMEfinder pipeline. **A.** Files necessary to run DAMEfinder are reported in yellow rectangles. White rectangles show the main R outputs from DAMEfinder. Steps to be run before DAMEfinder are in the circle, i.e., fastq files undergo quality control and read alignment with **bismark** [42]. The resulting bam file is used to calculate an ASM score, which can be done in two ways: **B.** (i) the tuple-based strategy that takes as input a beforehand created **methtuple** [40] file. The score is calculated based on the read counts of pairs of CpG sites. (ii) the SNP-based strategy, which takes as input both the bam file and a VCF file with heterozygous SNPs. Here the score is calculated for each CpG site in the reads containing a SNP. **C.** We determine differential ASM by calculating a statistic based on either the tuple ASM or the SNP-ASM (using **limma** [38]), which reflects the difference between two conditions (Group A vs. Group B) for each genomic position (tuple or site). DAMEs are defined based on this statistic, as regions of contiguous positions with a consistent change in ASM.

## 142 The ASM score

### 143 SNP-based ASM

144 The most straightforward way of detecting ASM from mapped reads, is by assigning them to  
 145 either of the alleles at each known heterozygous SNP. Methylation status is then determined  
 146 for each allele-linked cytosines in the reads. We have used this strategy to calculate a  
 147 SNP-based ASM score ( $ASM^i_{snp}$ ), and consider it to be the genuine form of ASM, since it is  
 148 derived from an extra layer of information, i.e. the genotype of an individual.

149 We extract the reads overlapping every heterozygous SNP in a VCF file with the  
150 **GenomicAlignments** R package [43], and for each read determine the methylation status  
151 of the CpG sites. Sites that are not in reads containing a SNP are not considered. We  
152 calculate  $ASM_{snp}^i$  for each CpG site  $i$  contained in the reads of a SNP as:

$$ASM_{snp}^i = abs\left\{\frac{X_M^{ir}}{X^{ir}} - \frac{X_M^{ia}}{X^{ia}}\right\} \quad (1)$$

153 where  $X_M^{ir}$  and  $X_M^{ia}$  correspond to the number of methylated reads from the reference  $r$  allele,  
154 and the alternative  $a$  allele. In practice, it makes no difference which allele is the reference or  
155 the alternative.  $X^{ir}$  and  $X^{ia}$  correspond to the total number of reads covering the reference  
156 and the alternative allele (see schematic in Figure 1B). The score ranges from 0 to 1, where a  
157 score of 1 represents the scenario where one allele is completely methylated, and the other  
158 allele is fully unmethylated; a value of 0 means an equal proportion of methylated sites in  
159 both alleles.

## 160 Tuple-based ASM

161 Instead of restricting ASM detection to allele-linked reads, we can make use of an entire  
162 set of CpG sites to detect ASM. For this task, we designed a score under the assumption  
163 that pairs of CpG sites in the same DNA molecule (read) are correlated [44, 45], and that  
164 in a biallelic organism, intermediate levels of methylation could represent allele-specificity,  
165 i.e., the proportion of methylated reads in a pair of CpG sites or tuple is close to 0.5. We  
166 calculate this score as a weighted log-odds ratio:

$$ASM_{tuple}^i = \log_{10}\left\{\frac{(X_{MM}^i + c)(X_{UU}^i + c)}{(X_{MU}^i + c)(X_{UM}^i + c)}\right\} \cdot w_i \quad (2)$$

167 where  $X^i$  corresponds to the number of reads covering a unique pair of CpG sites  $i$ , generated  
168 by running the **methtuple** tool. CpG sites in a pair can be methylated  $MM$ , unmethylated  
169  $UU$ , or mixed ( $UM$  or  $MU$ ). A constant  $c$  is added to every  $X^i$  to avoid dividing by 0. The  
170 log-odds ratio is multiplied by a weight,  $w_i$ , which is set such that the ratio of  $MM:UU$  can  
171 depart somewhat from a 50:50 relation, while  $MM$  or  $UU$  tuples, which represent absence of  
172 allele-specificity, are attenuated to 0. This is calculated as:

$$w_i = P(0.5 - \epsilon < \theta^i < 0.5 + \epsilon | X_{MM}^i, X_{UU}^i, \gamma_1, \gamma_2) \quad (3)$$

173 where  $\epsilon$  represents the degree of allowed departure from a 50:50 ratio, and  $\theta^i$ :

$$\theta^i | X_{MM}^i, X_{UU}^i, \gamma_1, \gamma_2 \sim Beta(\gamma_1 + X_{MM}^i, \gamma_2 + X_{UU}^i), \quad (4)$$

174 represents the moderated proportion of  $MM$  to  $MM+UU$  reads. It is based on a beta model,  
175 where  $\gamma_1$  and  $\gamma_2$  are hyperparameters set to penalize fully methylated or fully unmethylated  
176 tuples, i.e., when the  $MM : UU$  balance goes farther from a 50:50 relation. Similar to  
177  $ASM_{snp}^i$ , higher values of  $ASM_{tuple}^i$  (can be higher than 1), indicate putative presence of  
178 allele-specificity.

## 179 ASM score validation

180 In order to test the  $ASM_{tuple}$  score, we used the  $ASM_{snp}$  score as an indicator of true ASM,  
181 and calculated the  $ASM_{tuple}$  score, the **allelicmeth** and **amrfinder** scores, and a score  
182 representing absolute deviation from 50% methylation (methdeviation; see Methods), in a  
183 single normal tissue sample from the colorectal cancer (CRC) dataset (see Methods).

184 Figure 2 shows the true positive rate (TPR) and false positive rate (FPR) achieved  
 185 by the 4 evaluated scores at 3 different coverage thresholds (left to right), and 2  $ASM_{snp}$   
 186 cutoffs (top to bottom).  $ASM_{tuple}$  was consistently more sensitive and specific than the other  
 187 three scores, especially as coverage was increased. Intermediate methylation values yielded  
 188 comparable results, however the  $ASM_{tuple}$  was able to detect more cases of “real” ASM in  
 189 all combinations. **allelicmeth** increasingly failed as coverage and  $ASM_{snp}$  value increases.  
 190 **amrfinder** performed better than **allelicmeth** at higher true values.

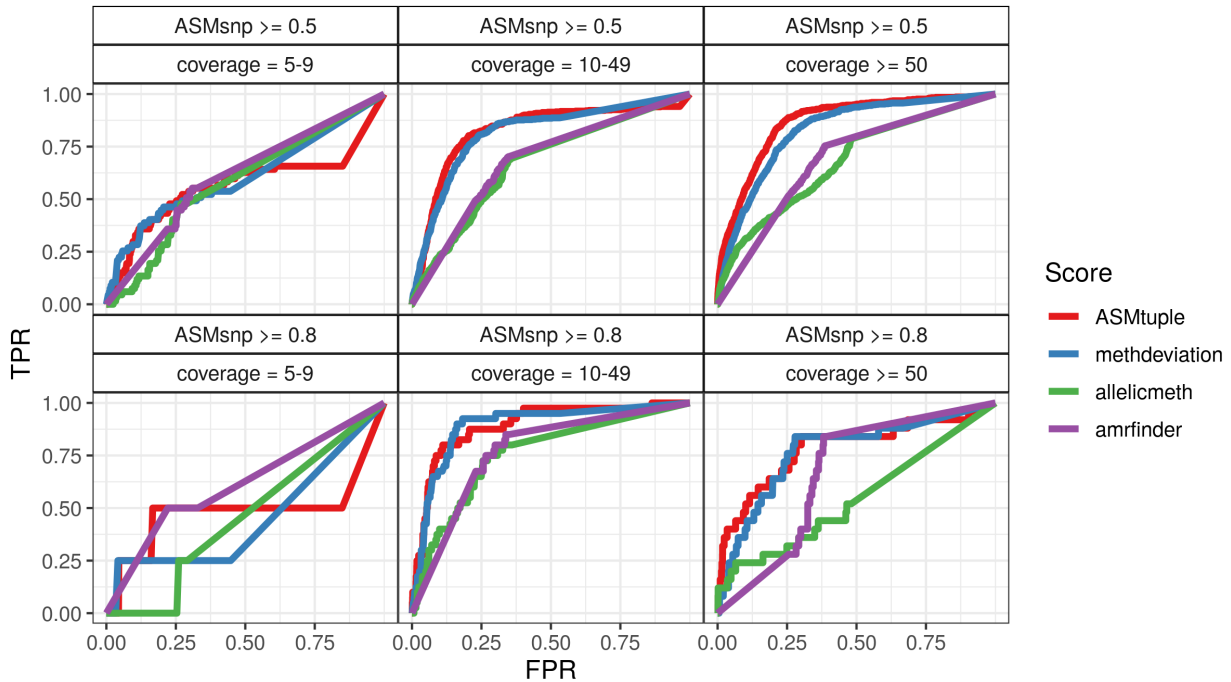

**Figure 2.** Comparison of the  $ASM_{tuple}$  score to **allelicmeth**, **amrfinder** and methylation deviation, by considering  $ASM_{snp}$  as true ASM. We calculated  $ASM_{tuple}$  scores (red), deviations from 50% methylation (blue), **allelicmeth** scores (green), **amrfinder** scores (purple) in a sample of normal colorectal mucosa included in the CRC dataset. The scores were compared to each other by plotting the FPR against the TPR achieved. The plots are drawn for different intervals of read coverage (5-9, 10-49,  $\geq 50$ ), and different levels of the  $ASM_{snp}$  score ( $\geq 0.5$ ,  $\geq 0.8$ ), which is considered the “true” ASM. Overall AUCs (area under the curve) for the top three panels:  $ASM_{tuple}$  = 0.83, deviations from 50% = 0.81, **allelicmeth** = 0.66, **amrfinder** = 0.68. Overall AUCs for the lower three panels:  $ASM_{tuple}$  = 0.82, deviations from 50% = 0.81, **allelicmeth** = 0.64, **amrfinder** = 0.72

191 As an additional validation of the  $ASM_{tuple}$  score, we used the blood dataset (see  
 192 Methods) to compare healthy male and female samples. In principle, females should exhibit  
 193 allele-specificity in the X chromosome due to XCI and thus higher  $ASM_{tuple}$  values. Figure 3  
 194 shows the distribution of  $ASM_{tuple}$  values across all samples in the dataset, in chromosome 3  
 195 and chromosome X. From a whole genome perspective (Figure 3A), there is little difference  
 196 between males and females in X chromosome (mean of row-means females: 0.13, males:  
 197 0.098), and practically no difference in chromosome 3 (0.060, 0.074). However, by focusing  
 198 on CpG tuples located in promoter regions (1 kb upstream the transcription start site - TSS),  
 199 we observed ASM values increased only in chromosome X of females (Figure 3B; 0.30, 0.088).

200 In the same blood dataset, we also compared the  $ASM_{tuple}$  scores from the promoters  
 201 of imprinted genes reported in [11] (see Methods), to the scores from rest of the genome  
 202 (Figure 3C). As expected, ASM scores were higher in the tuples located within imprinted  
 203 promoters, for both males and females.

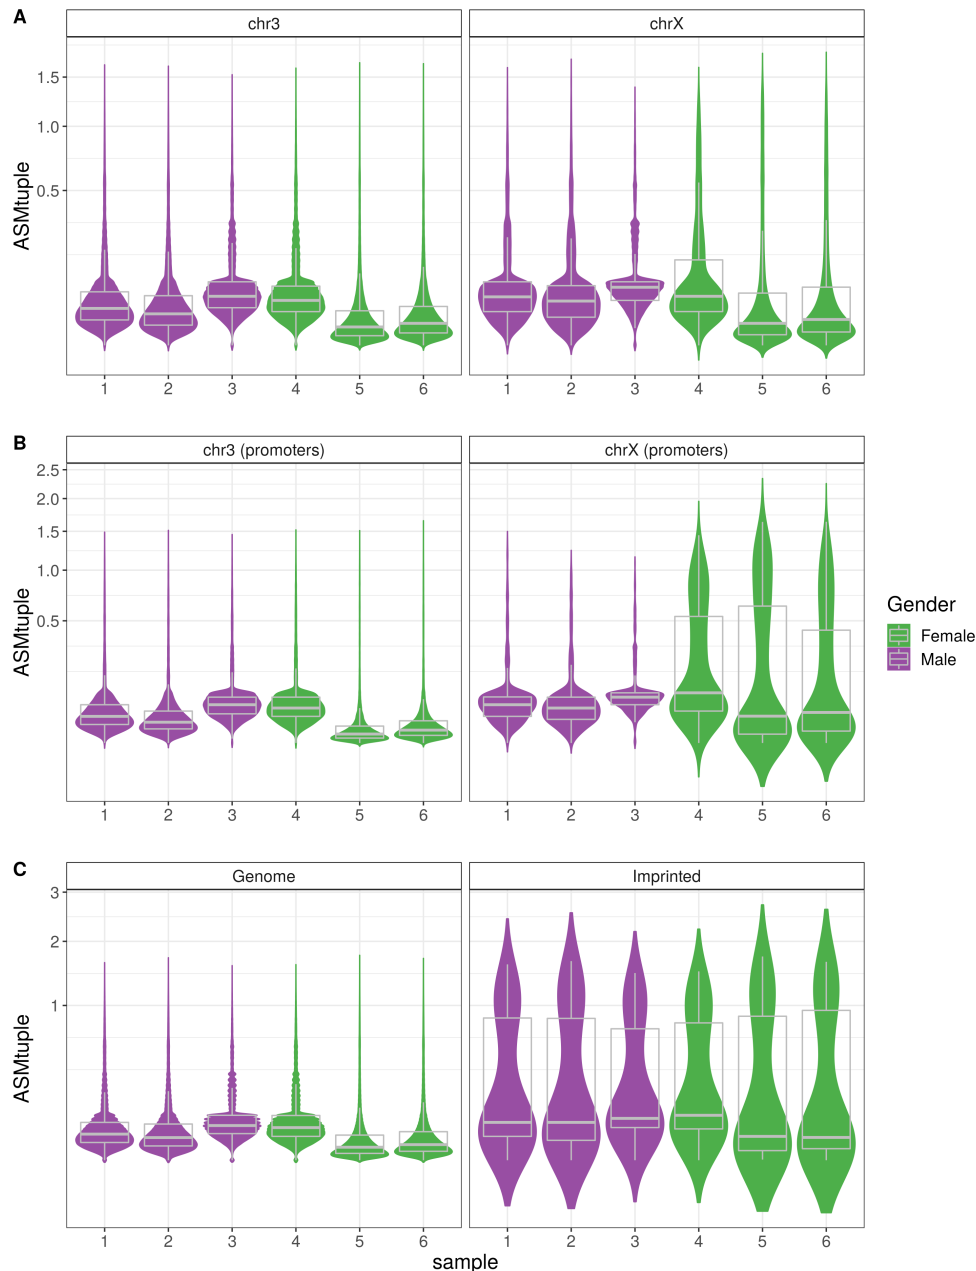

**Figure 3.**  $ASM_{tuple}$  distribution in the genome. We used XCI as a proof of concept for allele-specificity in females. Data from the blood dataset comprising 3 females and 3 males was used for this analysis. **A.** When considering all CpG tuples in the genome, the  $ASM_{tuple}$  distribution (y-axis) in chromosome 3 and chromosome X is similar in both genders. **B.** When considering CpG tuples located in promoter regions (i.e., 1 kb upstream of the TSS), the  $ASM_{tuple}$  score is higher in chromosome X of females. **C.** Promoter regions of 89 known imprinted regions (see Methods) also exhibit higher  $ASM_{tuple}$  compared to values in the rest of the genome. Y-axis in all plots is square-root transformed

## 204 DAME detection

205 As depicted in Figure 1, after calculating  $ASM_{tuple}$  or  $ASM_{snp}$  in the DAMEfinder pipeline,  
206 we continue to detect regions of persistent change in ASM between one condition to another  
207 within a cohort of samples. Change can occur as loss of ASM, when a reference group  
208 exhibits allele-specificity across a region (high values of ASM), and the group of interest  
209 has this same region fully methylated, unmethylated, or with random methylation (low  
210 values of ASM). Change can also occur as gain of ASM, where the reference group does not



211 have allele-specificity and the group of interest does. We call regions such as this DAMEs  
212 (Differentially Allele-specifically METHylated regions).

213 To detect DAMEs, we first obtain a regression coefficient  $\beta_{ij}$  followed by a t-statistic  
214 using the R package **limma** [38] (see Methods), on the transformed  $ASM_{tuple}^i$  score, or on  
215 the  $ASM_{snp}^i$  score, for each CpG position  $i$  (tuple or site), across  $j$  samples (see Methods for  
216 model).

217 We detect regions of contiguous CpG positions where  $\beta_{ij}$  persistently deviates in the  
218 same direction from zero; this is done in two ways:

### 219 **Permuting bumhunted-regions**

220 The **regionFinder** function from **bumphunter** is used to scan for regions ( $R$ ) where CpG  
221 sites close in proximity have  $\beta_{ij}$  above a user-defined threshold  $K$ , which corresponds to a  
222 percentile of  $\beta_{ij}$ . For each region detected, the function also calculates an area  $A = \sum_{i \in R} |\beta_{ij}|$ .  
223 For the CRC data set, we used the default value  $K = 0.7$ , and distance between CpG positions  
224 up to 100 bp.

225 We assess significance of every region detected by assigning an empirical p-value. For  
226 every non-redundant, permutation of the coefficient of interest (chosen from a column in the  
227 design matrix  $X$ ), **regionFinder** is applied again. All the areas generated by all permutations  
228 are pooled to generate a null distribution of areas [46]. We define the p-values for each  $R$   
229 as the proportion of null areas greater than the observed  $A$ ; p-values are adjusted using the  
230 Benjamini-Hochberg method [47] from the **stats** R package [37].

### 231 **Cluster-wise correction**

232 Optionally, we define regions that exhibit changes in ASM by first generating clusters of  
233 CpG sites with **clusterMaker**. For each cluster, we aggregate all the CpG position p-values  
234 generated by **limma** using the Simes method [41], which is applicable when test statistics  
235 exhibit positive dependence [48]. As implemented in [49], we calculate:

$$p_c = \min\{np_{(i)}/(i)\} \quad (5)$$

236 where  $p_{(1)}, \dots, p_{(n)}$  are the ordered p-values of each CpG position  $i$  in a cluster  $c$  and  $n$  is the  
237 number of CpG positions in the cluster.  $p_c$  summarizes evidence against the null hypothesis  
238 that all CpG positions are not differential. We adjust  $p_c$  as above.

### 239 **Evaluation of DAME detection**

240 We compared the different strategies to control FDR in the DAME detection pipeline, by  
241 applying them to a semi-simulated dataset and plotting the TPR and FDR achieved at  
242 different adjusted p-value thresholds (0.01, 0.05, 0.1) (Figure 4). We designed a small set of  
243 simulated DAMEs to evaluate the FDR control of the above strategies. We took 6 samples  
244 of normal tissue from the CRC dataset and calculated  $ASM_{snp}$  scores in each of them. We  
245 assumed these scores to be the  $ASM_{snp}$  baseline in the simulation. Then, we divided the  
246 samples into two groups of three samples each, and for all the CpG sites covered by the 6  
247 samples, we defined clusters of contiguous CpG sites. For each truly differential cluster, we  
248 added signal to a randomly determined subset of adjacent CpG sites (see Methods for more  
249 details).

250 Overall, the empirical p-value controlled the FDR, whereas the Simes method tended  
251 to be less conservative but more sensitive (Figure 4 and Supplementary Figure 1, Additional  
252 File 1 for same plot tested with different parameters).

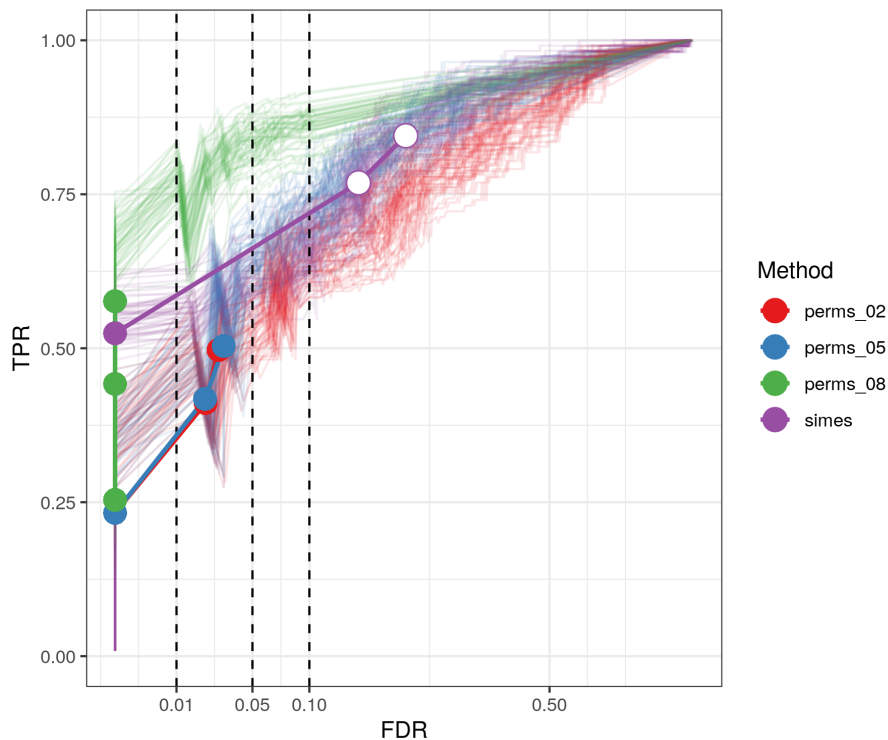

**Figure 4.** FDR control of p-value assignment strategies. We plot the FDR against the TPR achieved by the two alternatives for assigning p-values to a DAME: The first by generating permutations and setting a threshold  $K$  (see text) on the t-statistic (here 0.2,0.5,0.8), the second by using the Simes method. Lines are colored by strategy. Each strategy was run 50 times with the same simulation parameters. Colored circles indicate that the FDR achieved is smaller than the specified threshold (dashed lines at 0.01, 0.05 and 0.1), white circles indicate the opposite. x-axis is square-root transformed.

## 253 Discovery of DAMEs in colorectal cancer dataset

254 We used a previously published dataset comprising 6 patients with diagnosed colorectal  
255 cancer, three with CIMP (CpG-Island Methylator Phenotype), and three without CIMP (see  
256 Methods); DNA from normal mucosa and cancer lesions was bisulfite-sequenced. We ran  
257 **DAMEfinder** on this dataset in both modes, therefore obtaining the  $ASM_{snp}$  and  $ASM_{tuple}$   
258 scores. After filtering for coverage (more than 5 reads) and for sites with more than 80% of  
259 samples covered, we obtained information for 43,420 CpG sites using the  $ASM_{snp}$ . Using  
260 the tuple score, we obtained summaries for 1,849,831 CpG pairs. Within the **DAMEfinder**  
261 pipeline, we generated multi-dimensional scaling (MDS) plots using each score (Figures 5A  
262 and B), and observed that both scores are able to recover distinct CRC phenotypes. However  
263 using the  $ASM_{tuple}$  score, samples cluster according to tissue type (normals, CIMP cancer  
264 and non-CIMP cancer) (Figure 5A), whereas using the  $ASM_{snp}$  score, only the two cancer  
265 types are distinguishable, while the normal tissues cluster with their matched cancers (Figure  
266 5B).

267 We performed DAME detection on each score independently using the Cluster-wise  
268 correction (Supplementary Figure 2, Additional File 1 for p-values of both Cluster-wise  
269 correction and Permutations). When using the  $ASM_{snp}$  score, we could not detect DAMEs  
270 with an adjusted p-value below 0.05. Using the  $ASM_{tuple}$  score, we were able to detect 4,051  
271 DAMEs in the CIMP samples (versus matched normal samples), and 258 in the non-CIMP  
272 samples. We noticed that regions detected using  $ASM_{tuple}$  were also detected using  $ASM_{snp}$ ,  
273 but with lower strength of signal and with p-values above a cutoff of 0.05 (one example in  
274 Figure 5C), and other regions showing the contradicting changes in ASM (one example in

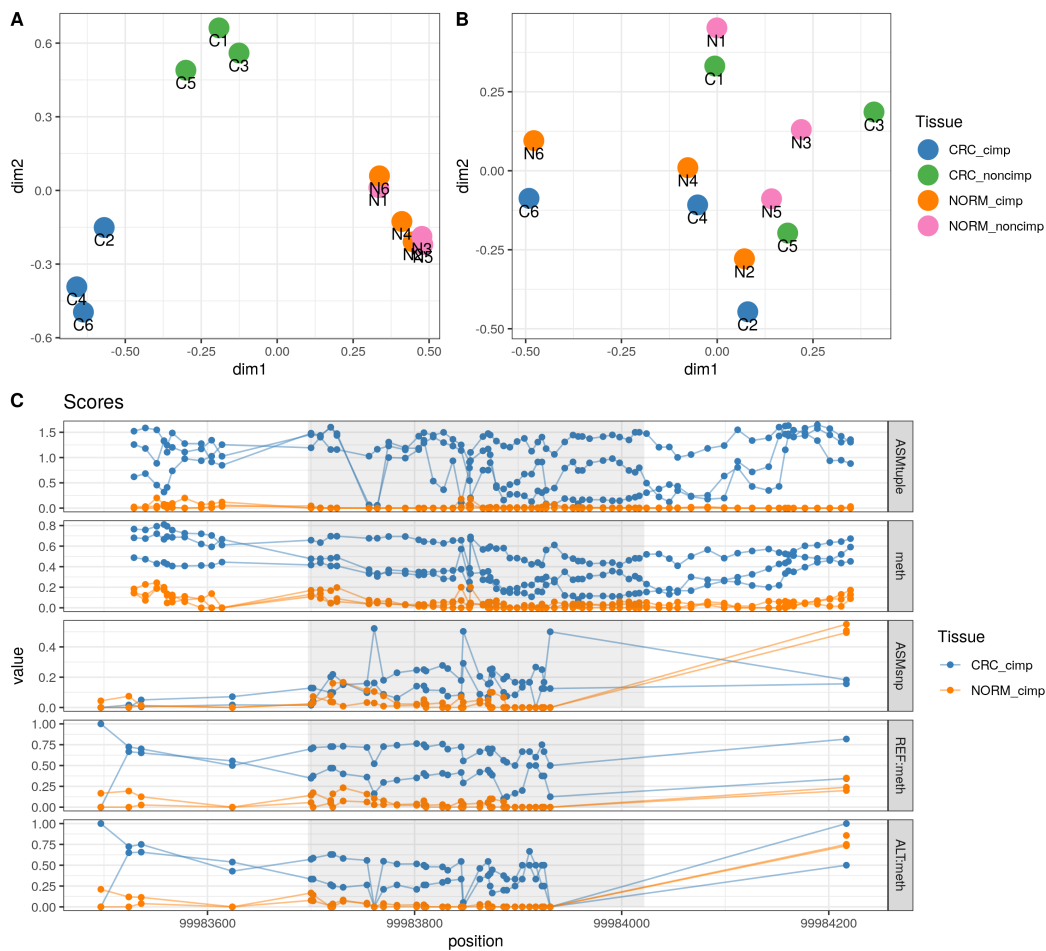

**Figure 5.** ASM scores on the CRC dataset. **A.** MDS plot of all the samples in the CRC dataset, based on all the the  $ASM_{tuple}$  scores. Scores were square-root transformed before plotting. **B.** MDS plot based on the  $ASM_{snp}$  scores. Scores were arcsine transformed. MDS plots were generated with the *plotMDS* function from *limma* and the top 1000 most variable positions. N: normal mucosa; C: CRC. Each pair of samples from the 6 patients with CRC are numbered from 1 to 6. **C.** A DAME detected in CIMP CRCs using the  $ASM_{tuple}$  score shows a higher signal than using the  $ASM_{snp}$  score. Region shown is located on chr9:99,983,697-99,984,022, shaded region in the center corresponds to the DAME. Tracks for methylation levels (meth) and methylation levels in reference and alternative alleles (based on SNP in chr9:99,983,812) is also shown. Points in  $ASM_{tuple}$  and meth tracks correspond to intermediate positions between a pair of CpG sites. Points in the rest of tracks correspond to CpG sites.

275 Supplementary Figures 3-4, Additional File 1). Additionally, we found DAMEs corresponding  
 276 to known regions exhibiting loss of imprinting in cancer, including those in the genes *MEG3*,  
 277 *H19*, and *GNAS* [13, 50] (Figure 6).

278 Considering the high number of DAMEs detected in the CIMP contrast compared to  
 279 the non-CIMP contrast, we thought this could be a consequence of hypermethylation in  
 280 CIMP [51], and a typical DMR (differentially methylated region) analysis would be able  
 281 to detect these same regions. To corroborate this, we performed a DMR analysis on the  
 282 CIMP and non-CIMP contrasts using the **dmrseq** R package [46] (Supplementary Figure 5,  
 283 Additional File 1 for top DAMEs and DMRs per comparison). We found that from the 6,753  
 284 DMRs (5,040 hypermethylated, 1,713 hypomethylated) detected in the CIMP comparison,  
 285 2,285 overlap with DAMEs (hypermethylated DMRs = 32%, hypomethylated DMRs = 1.7%  
 286 from total DMRs), and from 13,220 DMRs in the non-CIMP comparison, only 164 overlap  
 287 (hypermethylated DMRs = 0.57%, hypomethylated DMRs = 0.66%) (Table 1).

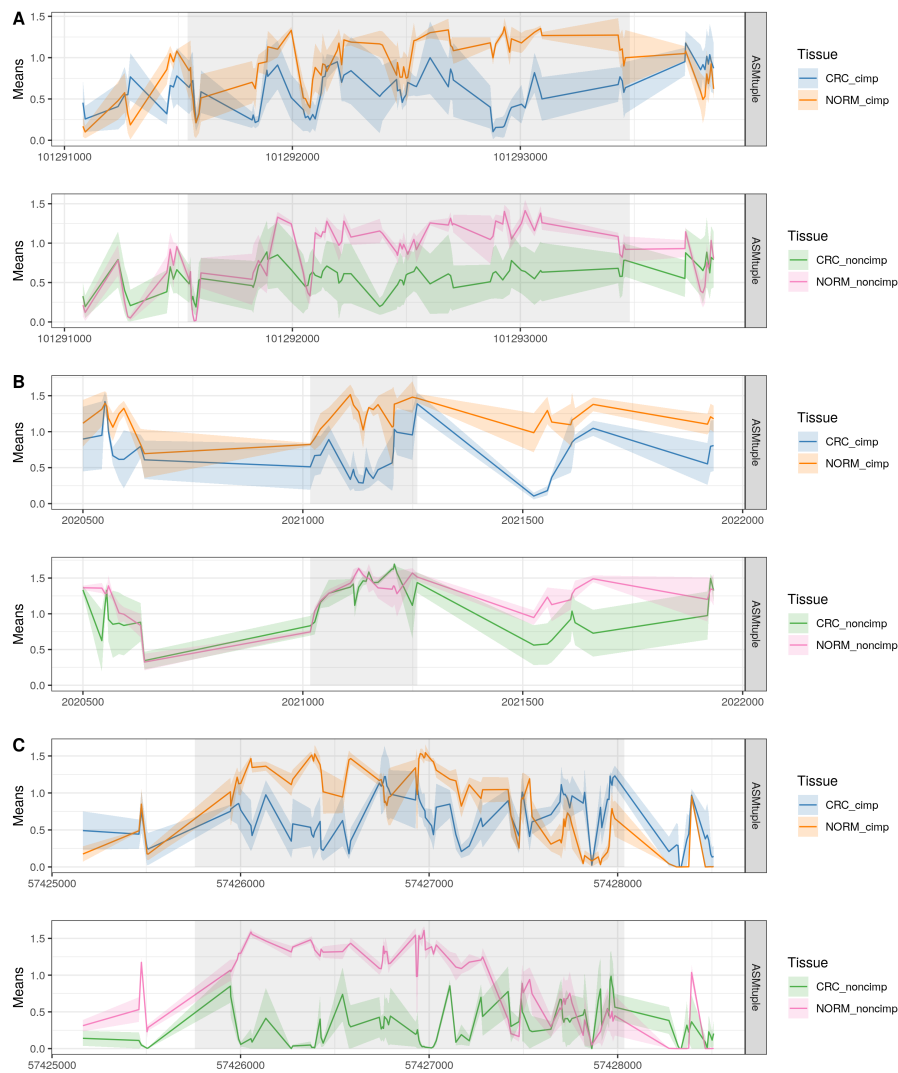

**Figure 6.** DAMEs overlapping known loci exhibiting loss of imprinting in colorectal cancer. **A.** DAME located in chr14:101,291,540-101,293,480, upstream the imprinted *MEG3* gene. The loss of imprinting was significant in both types of CRCs. **B.** DAME located in chr11:2,021,017-2,021,260, upstream the imprinted *H19* gene. Loss of imprinting only occurred in CIMP CRCs. **C.** DAME in the *GNAS* gene located in chr20:57,425,758-57,428,036. Loss of imprinting was detected in both types of CRCs. Y-axis in all panels corresponds to  $ASM_{tuple}$  means. Lines connect means at intermediate positions between a pair of CpG sites. Shared areas correspond to confidence intervals at each position (standard errors of the mean).

**Table 1.** DMRs overlapping DAMEs. Hyper or hypo-methylated DMR refers to the increase or decrease of methylation in cancers in comparison with paired normal samples, while gain or loss of ASM refers to whether cancers have more or less allele-specificity than paired normal samples.

| DMR state |       | Total DMRs | DMRs with DAMEs | DAMEs with DMRs | Gain / Loss ASM |
|-----------|-------|------------|-----------------|-----------------|-----------------|
| CIMP      | Hyper | 5,040      | 2,171           | 2,789           | 2,694 / 95      |
|           | Hypo  | 1,713      | 114             | 116             | 88 / 28         |
| non-CIMP  | Hyper | 3,187      | 76              | 77              | 61 / 16         |
|           | Hypo  | 10,033     | 88              | 88              | 64 / 24         |

288 Because of this overlap, we conclude that a proportion (1,146 [28%] in CIMP, 93 [36%]  
 289 in non-CIMP) of DAMEs would not be detected via a typical DMR analysis. Figure 7 shows  
 290 4 examples of DAMEs missed by the DMR detection. In principle, these regions exhibit

291 differential methylation according to the global methylation levels (bottom panels of each  
292 region), however the hypermethylation reaches intermediate values, which might not represent  
293 a sufficiently high effect size to be detected. However, in the context of differential ASM,  
294 these intermediate values are highly scored, based also on the allele-specificity of the change.  
295 Therefore, even though these are not highly ranked DAMEs, they were still included as such.

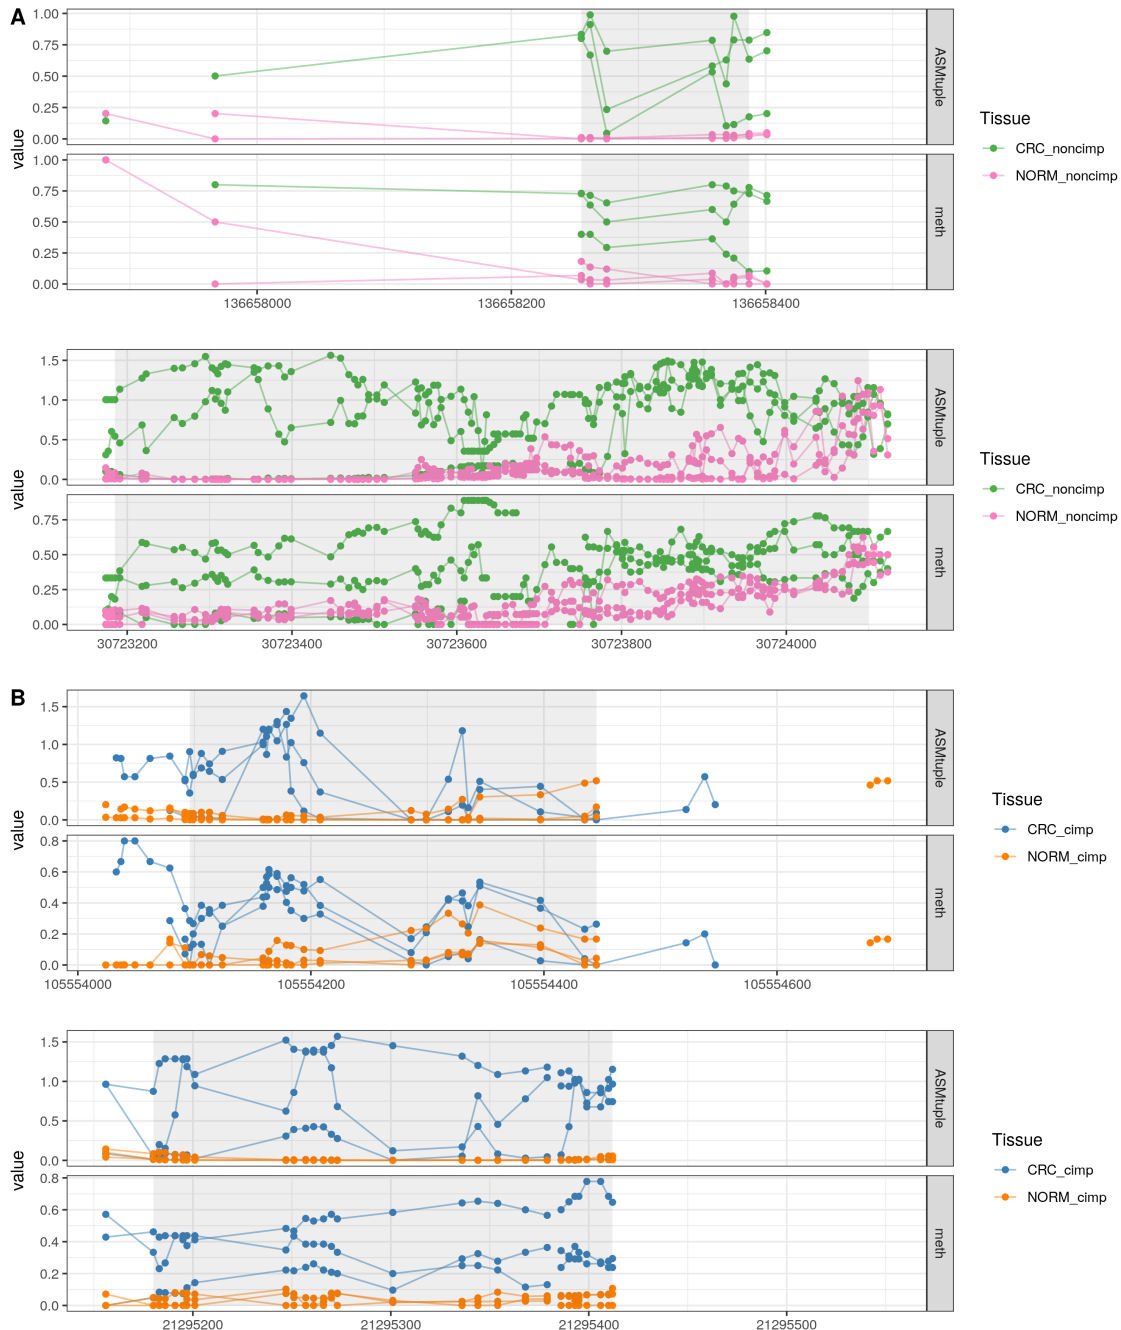

**Figure 7.** DAMEs not detected as DMRs. **A.** Two different DAMEs in non-CIMP, the first located in chr9:136,658,255-136,658,387, and the second located in chr4:30,723,185-30,724,099. **B.** Two different DAMEs in CIMP, the first in chr14:105,554,096-105,554,445; the second in chr16:21,295,180-21,295,412. Y-axis corresponds to  $ASM_{tuple}$  or methylation. Points correspond to intermediate positions between a pair of CpG sites.

## 296 Discussion

297 We have developed a scoring method that provides a measure of allele-specific methylation,  
298 and developed a method (DAMEfinder) that detects regions that display loss or gain of  
299 allele-specific methylation, by leveraging existing methods into a single framework. We offer  
300 the possibility to detect regions exhibiting ASM based on genotype information ( $ASM_{snp}$ ), or  
301 independent from it ( $ASM_{tuple}$ ). The latter offers a novel approach for identifying different  
302 types of ASM, such as imprinted, non-imprinted, XCI, and new types yet to be described.

303 Compared to existing scores (**allelicmeth**, deviations from 50% methylation),  $ASM_{tuple}$   
304 showed favourable performance at identifying individual cases of ASM at different coverage  
305 levels. The scaled methylation also demonstrated high sensitivity and specificity, and as the  
306 true ASM score ( $ASM_{snp}$ ) and coverage were increased, results were close to those of the  
307  $ASM_{tuple}$  score. Nonetheless, the advantage of using the  $ASM_{tuple}$  score is the flexibility in  
308 its implementation; specifically, the weight that is added to the log-odd ratio can be adapted  
309 to the user's needs. As an example, one could argue that a 50:50 proportion of methylated  
310 to unmethylated reads is not a good indicator of ASM. This assumption can be relaxed or  
311 changed within the model by changing the level of departure  $\epsilon$  in the weight calculation.

312 In contrast, the **allelicmeth** score reduced its performance when the true ASM value was  
313 increased. As for **amrfinder**, we believe defining ASM as regional is a nice implementation  
314 in this method, and can make ASM interpretation and visualization easier. However, the  
315 definition of regions is done for each sample independently, and this does not allow for a  
316 direct comparison between samples. This is the main reason why our ASM scores are not  
317 regional. Our method focuses on obtaining regions of consistent *change* in ASM between  
318 conditions relative to the variability, which in turn implies consistent ASM in the majority of  
319 samples from an experimental condition.

320 Our  $ASM_{tuple}$  score was able to distinguish female from male samples based on XCI.  
321 When analyzing the entire genome however, we did not find differences between males and  
322 females. The fact that the entire female chromosome X does not contain high ASM, or that  
323 the global distribution of methylation is not skewed towards intermediate values has been  
324 shown before [52]. The presence of genes escaping XCI may also affect global ASM. It is  
325 known that 15% of genes escape XCI, and an additional 10% vary in the inactivation state  
326 among the female population [53]. Therefore, a mixture of ASM scores in females is an  
327 accurate reflection of the complex dynamics of XCI.

328 We were also able to validate the score by comparing the promoters of 89 known  
329 imprinted genes with the rest of the genome. We observed an increase in the ASM of  
330 imprinted genes, with a bimodal distribution of ASM scores. This can be a reflection of  
331 tissue or cell type specificity in imprinted genes, meaning not all known imprinted genes  
332 show ASM throughout the somatic cell lineage, as is traditionally assumed [54]. Studies have  
333 reported tissue and cell type-specific allelic expression [55, 56] and tissue-specific ASM [23]  
334 in known imprinted genes, supporting our finding that imprinting is not equally maintained  
335 in all genes in every tissue and/or cell type.

336 Another aspect that could easily affect the range of ASM scores is cell heterogeneity,  
337 where we may expect a mixture of methylated and unmethylated alleles. The fact that the  
338 ASM scores observed in both the CRC and Blood datasets are continuous is likely a reflection  
339 of this. We expect ASM to be an all or none phenomenon, where “real” ASM should be either  
340 fully allele-specific (one allele fully methylated and the other fully unmethylated) or not (either  
341 both fully methylated, or both fully unmethylated). Additionally, reads from the colorectal  
342 cancer dataset were sequenced from cancerous tissue, which is typically associated with high  
343 intra-tumor heterogeneity of several biological features, including cellular morphology and

344 gene expression [57]. Our method does not account for this additional variability, and we  
345 recognize this as a limitation. However, we believe the ASM scores are still robust enough to  
346 detect allelic patterns as shown by the recovery of the colorectal cancer subtypes in Figure 5  
347 and that even changes in cell composition, which would also affect DMR detection, can be  
348 interesting events to understand.

349 To obtain all-or-none ASM, single cell BS-seq (scBS-seq) data may become the most  
350 suitable high-throughput technology. Previous studies have shown the use of scBS-seq to  
351 detect heterogeneity within a single cell type [58] and cell states [59]. However, the accurate  
352 detection of methylation from scBS-seq is still a difficult task, mainly due to the extensive  
353 DNA damage from the bisulfite treatment. There are currently around 21 different protocols  
354 to profile single cell DNA methylation, mostly bisulfite-based, each one aiming at improving  
355 recovery of CpGs and mapping efficiency [60]. However, it has not been established how  
356 these methods compare to each other, and a consistent framework for their data analysis  
357 does not exist, as is the case for bulk BS-seq protocols. Therefore there is still work ahead to  
358 precisely quantify ASM using scBS-seq.

359 Regarding DAME detection, we offer two strategies that differ in the statistical strin-  
360 gency. In our experience, fewer regions are obtained by permuting the group labels, since  
361 the FDR control is more conservative. However, more regions can always be detected by  
362 setting the  $K$  threshold lower, while still controlling the FDR. The Cluster-wise correction,  
363 or Simes method is less conservative, and therefore can be used as an alternative to extract  
364 more detection power. This is likely because of the global hypothesis tested at each DAME,  
365 where at least one CpG site in a region is changed.

366 We applied DAMEfinder to a real dataset to detect DAMEs in CIMP and non-CIMP  
367 cancers (versus paired normal samples). We found that the  $ASM_{tuple}$  and  $ASM_{snp}$  scores  
368 are consistent in describing the CIMP status of samples, but as expected, the  $ASM_{snp}$  score  
369 was dominated by SD-ASM, because its calculation relies on the heterozygous SNPs of each  
370 sample; paired samples thus clustered with each other not by tissue, as observed with the  
371  $ASM_{tuple}$  score. Additionally,  $ASM_{tuple}$  typically detected more DAMEs, which we attribute  
372 to two reasons. First, there are  $\sim 40x$  more places in the genome where  $ASM_{tuple}$  can be  
373 calculated. Second, because the tuple score is a more general calculation, i.e., it quantifies  
374 the mixing of methylated and unmethylated reads, instead of relying on allele information.

375 We also compared the DAME detection to a typical DMR analysis of the same samples,  
376 and found that DMRs detected may or may not include DAMEs. Most DMRs overlapping  
377 DAMEs were hypermethylated in CIMP cancers, which led us to conclude that most DAMEs  
378 reflected gain of ASM from a low methylation baseline. This result shows how differential  
379 ASM is a more refined definition of differential methylation, and can therefore provide  
380 additional information regarding methylation disruptions in disease (or different conditions).

## 381 Conclusion

382 Cytosine methylation restricted to only one allele, i.e., ASM, is a particular pattern of  
383 methylation that should be approached differently than the rest of the human methylome.  
384 We have designed DAMEfinder to screen for ASM and identify regions of differential ASM.  
385 The latter can be viewed as a special case of differential methylation. Previous studies have  
386 quantified ASM within one sample, however, to our knowledge, there is no method that  
387 identifies loss or gain of ASM between conditions. DAMEfinder fills this gap. Studying  
388 changes in ASM can help us understand epigenetic processes in development and diseases. To  
389 this aim, further studies are necessary to associate ASM to allele specific gene expression and  
390 to verify whether gain or loss of ASM would affect gene dosage and eventually phenotypes.

## 391 Methods

392 The code used to generate the article figures and data processing is available from [https://github.com/markrobinsonuzh/allele\\_specificity\\_paper](https://github.com/markrobinsonuzh/allele_specificity_paper).  
393 The R package is available from <https://github.com/markrobinsonuzh/DAMEfinder>.  
394

## 395 Data Sets

### 396 Colorectal cancer (CRC) data set

397 The CRC data set came from our published study [51] describing the progression of a  
398 methylation signature from pre-cancerous lesions to colorectal cancer tissue in two types  
399 of CRC. We used 12 samples from 6 patients with sporadic cancer (arrayexpress accession  
400 number: E-MTAB-6949, Table 2). For each sample, DNA from both CRC lesion and normal  
401 mucosa was bisulfite treated and sequenced according the Roche SeqCapEpi CpGiant protocol,  
402 where only DNA captured by probes was sequenced. We analyzed 12 files in total. For details  
403 on data generation refer to [51].

**Table 2.** Colorectal cancer sample characteristics. \*Sample ID changed from arrayexpress. C: CRC; N: paired sample of normal mucosa; non-CIMP: the mismatch repair gene MLH1 normally expressed; CIMP: MLH1 silenced by promoter hypermethylation.

| Sample ID* | CIMP status | Sex | Number of mapped reads | Average coverage | Average coverage in probes |
|------------|-------------|-----|------------------------|------------------|----------------------------|
| N1         |             |     | 76,801,310             | 3.025            | 78.06                      |
| C1         | non-CIMP    | F   | 68,010,696             | 2.47             | 61.62                      |
| N2         |             |     | 74,815,980             | 2.97             | 69.96                      |
| C2         | CIMP        | M   | 62,122,636             | 2.47             | 63.16                      |
| N3         |             |     | 66,608,688             | 2.64             | 63.88                      |
| C3         | non-CIMP    | M   | 57,828,284             | 2.28             | 57.52                      |
| N4         |             |     | 66,108,442             | 2.62             | 58.61                      |
| C4         | CIMP        | M   | 59,390,888             | 2.35             | 61.25                      |
| N5         |             |     | 70,070,214             | 2.56             | 59.0032                    |
| C5         | non-CIMP    | M   | 68,575,884             | 2.50             | 49.98                      |
| N6         |             |     | 59,056,548             | 2.15             | 49.52                      |
| C6         | CIMP        | F   | 79,669,532             | 2.92             | 71.39                      |

### 404 Blood dataset

405 We used data generated by the Blueprint Consortium. We downloaded raw paired-end  
406 fastq files from venous blood of 3 healthy females and 3 healthy males (CD14-positive,  
407 CD16-negative classical monocyte, EGA dataset: EGAD00001002523).

## 408 Quality control and mapping

409 Quality control was done using **fastQC** (version 0.11.4) [61]. The reads were subsequently  
410 trimmed using **TrimGalore!** (version 0.4.5) [62]. Reads were mapped to the reference  
411 genome using **bismark** (version 0.18.0). **Bowtie2** (version 2.2.9) was used to map to genome  
412 hg19 in the CRC data set, and hg38 in the Blood dataset. Duplicate reads were removed with



**Table 3.** Blood data sample characteristics. \*Sample ID changed from source.

| Sample ID* | Sex | Number of mapped reads | Average coverage |
|------------|-----|------------------------|------------------|
| 1          | M   | 390,837,942            | 12.73            |
| 2          | M   | 420,368,438            | 13.70            |
| 3          | M   | 305,490,164            | 9.95             |
| 4          | F   | 383,782,378            | 12.50            |
| 5          | F   | 581,667,082            | 18.86            |
| 6          | F   | 572,224,352            | 18.55            |

413 the *deduplicate* command from **bismark**. Deduplicated bam files corresponding to technical  
414 replicates in the Blood data set were merged with **samtools merge** [63] for each sample.

## 415 SNP calling

416 We extracted heterozygous SNPs from the CRC dataset bam files with **Bis-SNP** (version  
417 1.0.0) [32] by running the *BisulfiteGenotyper* mode with default parameters, using the **dbSNP**  
418 (Build150) [64] generated VCF file from the NCBI Human Variation Sets (GRCh37p13, last  
419 modified:07-10-2017).

## 420 methtuple

421 **Methtuple** (version 1.5.3) [40] was used to produce a list of unique tuples of size two and  
422 the corresponding MM, MU, UM, and UU counts where M stands for “methylated” and U  
423 for “unmethylated”. The bam files of each sample are those of PE reads and so they were  
424 sorted by queryname before using **methtuple**, as the tool demands it.

## 425 tuple-based ASM Score

426 We used  $\gamma_1 = \gamma_2 = 0.5$  and  $\epsilon = 0.2$  for all analyses, and allowed for a maximum distance  
427 of 150 base pairs between two CpGs in a tuple. Supplementary Figure 6, Additional File  
428 1, show  $ASM_{tuple}$  diagnostic plots for the CRC dataset (and Supplementary Figure 7 with  
429  $ASM_{snp}$ ).

## 430 $ASM_{tuple}$ score transformation

431 We apply a square root transformation to the  $ASM_{tuple}$  score before running **limma**, to get  
432 a more stable mean-variance relationship.

$$L(ASM_{tuple}) = \sqrt{|ASM_{tuple}|} \quad (6)$$

## 433 allelicmeth

434 **allelicmeth** (**MethPipe** version 3.4.3) [33] is a tool that also detects ASM for a given sample  
435 directly from BS-seq reads. The tool is part of the **MethPipe** pipeline [65], which does not  
436 use standard bam files. We used commands from the pipeline to transform our **bismark**  
437 bam files from the CRC dataset into *mr* files, the input to **allelicmeth**. The output is a  
438 bed file with p-values for each pair of CpG sites, reflecting the degree of allele-specificity.

## 439 **amrfinder**

440 **amrfinder** (MethPipe version 3.4.3) [33] also detects ASM from the BS-seq reads, however  
441 it generates regional scores. As with **allelicmeth**, we transformed **bismark** bam files from  
442 the CRC dataset into *mr* files, then ran *methstates* to generate *epiread* files, and used these  
443 to run **amrfinder** with default parameters. The output is a bed file with p-values for each  
444 genomic region with consistent ASM.

## 445 **Score evaluation**

446 We converted the  $ASM_{snp}$  into a tuple- $ASM_{snp}$  as  $abs\left\{\frac{X_M^{i1r}+X_M^{i2r}}{X^{i1r}+X^{i2r}} - \frac{X_M^{i1a}+X_M^{i2a}}{X^{i1a}+X^{i2a}}\right\}$ , where 1 and  
447 2 are the the first and second CpG site in a tuple  $i$ . We treated this converted score as true  
448 allele-specific methylation to test our scores at two thresholds:  $\geq 0.5$  and  $\geq 0.8$ .

449 We transformed the p-values generated by **allelicmeth** and **amrfinder** with a negative  
450 log base 10. We assigned the same transformed p-values to all CpG tuples included in a  
451 single **amrfinder** region.

452 We also compared to a score based on whether the proportion of methylated reads to  
453 total number of reads deviates from 0.5, but transformed so a value of 0.5 is indicative of  
454 high ASM, and 1 or 0 is the lowest ASM. The score is  $1 - 2(|methylation - 0.5|)$ .

455 We used these four metrics to build ROC curves at different read coverages (5-9, 10-49  
456 and  $\geq 50$ ) and at different thresholds of  $ASM_{snp}$ , for a single normal mucosa sample in the  
457 CRC data set.

458 As an additional validation, we used the Blood dataset to obtain the  $ASM_{tuple}$  scores  
459 from the promoters of known imprinted genes reported in [11]. Only gene symbols that  
460 were traceable with **biomaRt** [66, 67] were included, and genes labelled to be imprinted in  
461 placenta were removed, as indicated in [68, 69].

## 462 **t-statistic calculation**

463 From the **limma** R package [38], we use **lmFit** to fit a linear model for each CpG position,  
464 and **eBayes** to calculate a moderated t-statistic on the transformed  $ASM_{tuple}$  score, or on  
465 the  $ASM_{snp}$  score. For the former, we set the median of two CpGs in a tuple as the CpG  
466 position of that tuple. Transformed ASM scores across samples are given as input to **lmFit**,  
467 as well as a design matrix that specifies the conditions of the samples of interest. As specified  
468 in [38, 70], a CpG site-wise or tuple-wise linear model is defined as:

$$E(y_i) = X\beta_i \quad (7)$$

469 where for each CpG site or tuple  $i$ , we have a vector of ASM scores  $y_i$  and a design matrix  $X$   
470 that relates these values to some coefficients of interest  $\beta_i$ .

471 In the end, we test for a specific contrast that  $H_0 : C_{\beta_{ij}} = 0$ .

## 472 **Smoothing**

473 We group the positions into genomic clusters using the **clusterMaker** function from the  
474 **bumphunter** R package [39]. Then we use the **loessByCluster** function to perform loess  
475 within each cluster, and obtain  $\tilde{\beta}_{ij}$ , our smoothed estimate.

## 476 FDR control evaluation

477 We selected 6 samples of normal tissue from the CRC dataset and calculated their  $ASM_{snp}$   
478 scores as a baseline in the simulation. We divided the samples in 2 groups of 3. We generated  
479 1038 clusters of CpGs with the **clusterMaker** function from the **bumphunter** package, and  
480 set a maximum distance between CpGs of 100 bp (Supplementary Figure 8, Additional File  
481 1). We chose 20% of all clusters to be truly differential, and to each of them added effect to a  
482 number of randomly selected consecutive CpGs. The effect size is the same for every chosen  
483 CpG per cluster, and is obtained by inverse transform sampling of the form  $F_X^{-1}(u) = x$ ,  
484 where  $u \sim Unif(0.35, 0.75)$ , and  $F_X(x)$  the CDF of  $Beta(1, 2.5)$  [46] (Supplementary Figure  
485 9, Additional File 1). Additionally, for each truly differential cluster, we randomly selected  
486 the sign of the effect size (positive or negative), as well as the group of samples that contains  
487 the effect size.

488 We generated 50 of these simulations, and for each of them, ran DAMEfinder with the  
489 cluster-wise correction, and the permutation correction (Supplementary Figure 10, Additional  
490 File 1 for distributions of null and observed areas) with three different  $K$  thresholds: 0.2, 0.5,  
491 0.8. We used the **iCOBRA** R package (version 1.12.1) [71] to calculate TPR and FDR at  
492 different adjusted p-value thresholds: 0.01, 0.05, 0.1.

## 493 DMR detection

494 We identified DMRs with the **dmrseq** R package (version 1.5.11) [46] for each cancer subtype.  
495 We specified the tissue via the *testCovariate* parameter (CIMP, non-CIMP or normal), and  
496 the patient with the *adjustCovariate* parameter. The *cutoff* parameter (cutoff of the single  
497 CpG coefficient that is used to discover candidate regions) was set as 0.05 and the rest of  
498 parameters were set as default.

## 499 Author's contributions

500 MM and MDR conceived the study. SO, DM and MDR wrote package, performed analyses.  
501 SO, GM and MDR wrote the paper. All authors read and approved the final manuscript.

## 502 Funding

503 GM and SO acknowledge funding from the SNF grant 310030-160163/1. MDR acknowledges  
504 support from the University Research Priority Program Evolution in Action at the University  
505 of Zurich.

## 506 Acknowledgements

507 The authors thank Abdullah Kahraman for technical support at previous stages of the project;  
508 Pierre-Luc Germain and Izaskun Mallona for feedback on the manuscript; and the Robinson  
509 lab for feedback on figures and analysis.

## References

- 510
- 511 [1] Cedar, H. and Bergman, Y. (2009). Linking DNA methylation and histone modification: patterns and  
512 paradigms. *Nature Reviews Genetics*, 10:295–304.
- 513 [2] Bonasio, R., Tu, S., and Reinberg, D. (2010). Molecular signals of epigenetic states. *Science*, 330(6004):612–  
514 616.
- 515 [3] Bird, A. P. (1978). Use of restriction enzymes to study eukaryotic DNA methylation: II. the symmetry of  
516 methylated sites supports semi-conservative copying of the methylation pattern. *Journal of Molecular*  
517 *Biology*, 118(1):49–60.
- 518 [4] Suzuki, M. M. and Bird, A. (2008). DNA methylation landscapes: provocative insights from epigenomics.  
519 *Nature Reviews Genetics*, 9:465–476.
- 520 [5] Bergman, Y. and Cedar, H. (2013). DNA methylation dynamics in health and disease. *Nature Structural*  
521 *& Molecular Biology*, 20:274–281.
- 522 [6] Clark, S. J., Statham, A., Stirzaker, C., Molloy, P. L., and Frommer, M. (2006). DNA methylation:  
523 bisulphite modification and analysis. *Nature protocols*, 1(5):2353–2364.
- 524 [7] Liu, Y., Siejka-Zielinska, P., Velikova, G., Bi, Y., Yuan, F., Tomkova, M., et al. (2019). Bisulfite-free  
525 direct detection of 5-methylcytosine and 5-hydroxymethylcytosine at base resolution. *Nature Biotechnology*,  
526 37(4):424–429.
- 527 [8] Reddington, J. P., Pennings, S., and Meehan, R. R. (2013). Non-canonical functions of the DNA  
528 methylome in gene regulation. *Biochemical Journal*, 451(1):13–23.
- 529 [9] Ferguson-Smith, A. C. (2011). Genomic imprinting: the emergence of an epigenetic paradigm. *Nature*  
530 *Reviews Genetics*, 12:565–575.
- 531 [10] Bartolomei, M. S. and Ferguson-Smith, A. C. (2011). Mammalian genomic imprinting. *Cold Spring*  
532 *Harbor Perspectives in Biology*, 3(7).
- 533 [11] Tucci, V., Isles, A. R., Kelsey, G., Ferguson-Smith, A. C., and the Erice Imprinting Group (2019).  
534 Genomic imprinting and physiological processes in mammals. *Cell*, 176(5):952–965.
- 535 [12] Knoll, J. H. M., Nicholls, R. D., Magenis, R. E., Graham Jr., J. M., Lalande, M., Latt, S. A., et al.  
536 (1989). Angelman and prader-willi syndromes share a common chromosome 15 deletion but differ in  
537 parental origin of the deletion. *American Journal of Medical Genetics*, 32(2):285–290.
- 538 [13] Cui, H., Onyango, P., Brandenburg, S., Wu, Y., Hsieh, C.-L., and Feinberg, A. P. (2002). Loss of  
539 imprinting in colorectal cancer linked to hypomethylation of H19 and IGF2. *Cancer Research*, 62(22):6442–  
540 6446.
- 541 [14] Schwienbacher, C., Gramantieri, L., Scelfo, R., Veronese, A., Calin, G. A., Bolondi, L., et al. (2000). Gain  
542 of imprinting at chromosome 11p15: A pathogenetic mechanism identified in human hepatocarcinomas.  
543 *Proceedings of the National Academy of Sciences*, 97(10):5445–5449.
- 544 [15] Lyon, M. F. (1961). Gene action in the X-chromosome of the Mouse (*Mus musculus* L.). *Nature*,  
545 190(4773):372–373.
- 546 [16] Kerkel, K., Spadola, A., Yuan, E., Kosek, J., Jiang, L., Hod, E., et al. (2008). Genomic surveys by  
547 methylation-sensitive SNP analysis identify sequence-dependent allele-specific DNA methylation. *Nature*  
548 *Genetics*, 40:904–908.
- 549 [17] Schalkwyk, L. C., Meaburn, E. L., Smith, R., Dempster, E. L., Jeffries, A. R., Davies, M. N., et al.  
550 (2010). Allelic skewing of DNA methylation is widespread across the genome. *The American Journal of*  
551 *Human Genetics*, 86(2):196–212.
- 552 [18] Tycko, B. (2010). Allele-specific DNA methylation: beyond imprinting. *Human Molecular Genetics*,  
553 19(R2):R210–R220.

- 554 [19] Gertz, J., Varley, K. E., Reddy, T. E., Bowling, K. M., Pauli, F., Parker, S. L., et al. (2011). Analysis of  
555 DNA methylation in a three-generation family reveals widespread genetic influence on epigenetic regulation.  
556 *PLOS Genetics*, 7(8):1–10.
- 557 [20] Onuchic, V., Lurie, E., Carrero, I., Pawliczek, P., Patel, R. Y., Rozowsky, J., et al. (2018). Allele-specific  
558 epigenome maps reveal sequence-dependent stochastic switching at regulatory loci. *Science*, 361(6409).
- 559 [21] Wang, H., Lou, D., and Wang, Z. (2019). Crosstalk of genetic variants, allele-specific DNA methylation,  
560 and environmental factors for complex disease risk. *Frontiers in Genetics*, 9:695.
- 561 [22] Do, C., Lang, C. F., Lin, J., Darbary, H., Krupska, I., Gaba, A., et al. (2016). Mechanisms and disease  
562 associations of haplotype-dependent allele-specific DNA methylation. *The American Journal of Human*  
563 *Genetics*, 98(5):934–955.
- 564 [23] Marzi, S. J., Meaburn, E. L., Dempster, E. L., Lunnon, K., Paya-Cano, J. L., Smith, R. G., et al. (2016).  
565 Tissue-specific patterns of allelically-skewed DNA methylation. *Epigenetics*, 11(1):24–35.
- 566 [24] Faraday, N., Yanek, L. R., Yang, X. P., Mathias, R., Herrera-Galeano, J. E., Suktitipat, B., et al. (2011).  
567 Identification of a specific intronic PEAR1 gene variant associated with greater platelet aggregability and  
568 protein expression. *Blood*, 118(12):3367–3375.
- 569 [25] Klengel, T., Mehta, D., Anacker, C., Rex-Haffner, M., Pruessner, J. C., Pariante, C. M., et al.  
570 (2012). Allele-specific FKBP5 DNA demethylation mediates gene-childhood trauma interactions. *Nature*  
571 *Neuroscience*, 16:33–41.
- 572 [26] Zhang, Y., Rohde, C., Reinhardt, R., Voelcker-Rehage, C., and Jeltsch, A. (2009). Non-imprinted  
573 allele-specific DNA methylation on human autosomes. *Genome Biology*, 10(12):R138.
- 574 [27] Serre, D., Lee, B. H., and Ting, A. H. (2009). MBD-isolated Genome Sequencing provides a high-  
575 throughput and comprehensive survey of DNA methylation in the human genome. *Nucleic Acids Research*,  
576 38(2):391–399.
- 577 [28] Down, T. A., Rakyian, V. K., Turner, D. J., Flicek, P., Li, H., Kulesha, E., et al. (2008). A bayesian  
578 deconvolution strategy for immunoprecipitation-based DNA methylome analysis. *Nature Biotechnology*,  
579 26:779–785.
- 580 [29] Laird, P. W. (2010). Principles and challenges of genome-wide DNA methylation analysis. *Nature*  
581 *Reviews Genetics*, 11:191–203.
- 582 [30] Cheung, W. A., Shao, X., Morin, A., Siroux, V., Kwan, T., Ge, B., et al. (2017). Functional variation in  
583 allelic methylomes underscores a strong genetic contribution and reveals novel epigenetic alterations in the  
584 human epigenome. *Genome Biology*, 18(1):50.
- 585 [31] Zhu, P., Guo, H., Ren, Y., Hou, Y., Dong, J., Li, R., et al. (2018). Single-cell DNA methylome sequencing  
586 of human preimplantation embryos. *Nature Genetics*, 50(1):12–19.
- 587 [32] Liu, Y., Siegmund, K. D., Laird, P. W., and Berman, B. P. (2012). Bis-SNP: Combined DNA methylation  
588 and SNP calling for Bisulfite-seq data. *Genome Biology*, 13(7):R61.
- 589 [33] Fang, F., Hodges, E., Molaro, A., Dean, M., Hannon, G. J., and Smith, A. D. (2012). Genomic landscape  
590 of human allele-specific DNA methylation. *Proceedings of the National Academy of Sciences of the United*  
591 *States of America*, 109(19):7332–7.
- 592 [34] Martos, S. N., Li, T., Ramos, R. B., Lou, D., Dai, H., Xu, J.-C., et al. (2017). Two approaches reveal  
593 a new paradigm of 'switchable or genetics-influenced allele-specific DNA methylation' with potential in  
594 human disease. *Cell Discovery*, 3:17038.
- 595 [35] Robinson, M. D., Kahraman, A., Law, C. W., Lindsay, H., Nowicka, M., Weber, L. M., and Zhou, X.  
596 (2014). Statistical methods for detecting differentially methylated loci and regions. *Frontiers in Genetics*,  
597 5:324.
- 598 [36] Shafi, A., Mitrea, C., Nguyen, T., and Draghici, S. (2018). A survey of the approaches for identifying  
599 differential methylation using bisulfite sequencing data. *Briefings in Bioinformatics*, 19:737–753.

- 600 [37] R Core Team (2019). *R: A Language and Environment for Statistical Computing*. R Foundation for  
601 Statistical Computing, Vienna, Austria.
- 602 [38] Ritchie, M. E., Phipson, B., Wu, D., Hu, Y., Law, C. W., Shi, W., and Smyth, G. K. (2015). limma  
603 powers differential expression analyses for RNA-sequencing and microarray studies. *Nucleic Acids Research*,  
604 43(7):e47.
- 605 [39] Jaffe, A. E., Murakami, P., Lee, H., Leek, J. T., Fallin, M. D., Feinberg, A. P., and Irizarry, R. A.  
606 (2012). Bump hunting to identify differentially methylated regions in epigenetic epidemiology studies.  
607 *International Journal of Epidemiology*, 41(1):200–9.
- 608 [40] Hickey, P. (2014). Methtuple.
- 609 [41] Simes, R. J. (1986). An improved Bonferroni procedure for multiple tests of significance. *Biometrika*,  
610 73(3):751–754.
- 611 [42] Krueger, F. and Andrews, S. R. (2011). Bismark: a flexible aligner and methylation caller for Bisulfite-Seq  
612 applications. *Bioinformatics*, 27(11):1571–1572.
- 613 [43] Lawrence, M., Huber, W., Pagès, H., Aboyoun, P., Carlson, M., Gentleman, R., et al. (2013). Software  
614 for computing and annotating genomic ranges. *PLOS Computational Biology*, 9(8):1–10.
- 615 [44] Shoemaker, R., Deng, J., Wang, W., and Zhang, K. (2010). Allele-specific methylation is prevalent and  
616 is contributed by cpG-snps in the human genome. *Genome Research*, 20(7):883–889.
- 617 [45] Affinito, O., Palumbo, D., Fierro, A., Cuomo, M., Riso, G. D., Monticelli, A., et al. (2019). Nucleotide  
618 distance influences co-methylation between nearby cpG sites. *Genomics*.
- 619 [46] Korthauer, K., Chakraborty, S., Benjamini, Y., and Irizarry, R. A. (2018). Detection and accurate  
620 false discovery rate control of differentially methylated regions from whole genome bisulfite sequencing.  
621 *Biostatistics*, page kxy007.
- 622 [47] Benjamini, Y. and Hochberg, Y. (1995). Controlling the false discovery rate: A practical and powerful  
623 approach to multiple testing. *Journal of the Royal Statistical Society. Series B (Methodological)*, 57(1):289–  
624 300.
- 625 [48] Benjamini, Y. and Heller, R. (2008). Screening for partial conjunction hypotheses. *Biometrics*, 64(4):1215–  
626 1222.
- 627 [49] Lun, A. T. L. and Smyth, G. K. (2014). De novo detection of differentially bound regions for ChIP-seq  
628 data using peaks and windows: controlling error rates correctly. *Nucleic Acids Research*, 42(11):e95.
- 629 [50] Menigatti, M., Staiano, T., Manser, C. N., Bauerfeind, P., Komljenovic, A., Robinson, M. D., et al.  
630 (2013). Epigenetic silencing of monoallelically methylated miRNA loci in precancerous colorectal lesions.  
631 *Oncogenesis*, 2:e56.
- 632 [51] Parker, H. R., Orjuela, S., Oliveira, A. M., Cereatti, F., Sauter, M., Heinrich, H., et al. (2018). The proto  
633 CpG island methylator phenotype of sessile serrated adenomas/polyps. *Epigenetics*, 13(10-11):1088–1105.
- 634 [52] Duncan, C. G., Grimm, S. A., Morgan, D. L., Bushel, P. R., Bennett, B. D., Barnabas, B. B., et al.  
635 (2018). Dosage compensation and DNA methylation landscape of the X chromosome in mouse liver.  
636 *Scientific Reports*, 8(1):10138.
- 637 [53] Carrel, L. and Willard, H. F. (2005). X-inactivation profile reveals extensive variability in X-linked gene  
638 expression in females. *Nature*, 434(7031):400–404.
- 639 [54] Wood, A. J. and Oakey, R. J. (2006). Genomic imprinting in mammals: Emerging themes and established  
640 theories. *PLOS Genetics*, 2(11):1–9.
- 641 [55] Hippenmeyer, S., Johnson, R. L., and Luo, L. (2013). Mosaic analysis with double markers reveals  
642 cell-type-specific paternal growth dominance. *Cell Reports*, 3(3):960–967.

- 643 [56] Baran, Y., Subramaniam, M., Biton, A., Tukiainen, T., Tsang, E. K., Rivas, M. A., et al. (2015). The  
644 landscape of genomic imprinting across diverse adult human tissues. *Genome Research*, 25(7):927–936.
- 645 [57] Marusyk, A. and Polyak, K. (2010). Tumor heterogeneity: Causes and consequences. *Biochimica et*  
646 *Biophysica Acta (BBA) - Reviews on Cancer*, 1805(1):105–117.
- 647 [58] Smallwood, S. A., Lee, H. J., Angermueller, C., Krueger, F., Saadeh, H., Peat, J., et al. (2014). Single-cell  
648 genome-wide bisulfite sequencing for assessing epigenetic heterogeneity. *Nature Methods*, 11:817–820.
- 649 [59] Farlik, M., Sheffield, N., Nuzzo, A., Datlinger, P., Schönegger, A., Klughammer, J., et al. (2015).  
650 Single-cell DNA methylome sequencing and bioinformatic inference of epigenomic cell-state dynamics. *Cell*  
651 *Reports*, 10(8):1386 – 1397.
- 652 [60] Karemaker, I. D. and Vermeulen, M. (2018). Single-cell DNA methylation profiling: Technologies and  
653 biological applications. *Trends in Biotechnology*, 36(9):952 – 965.
- 654 [61] Andrews, S. (2015). fastqc.
- 655 [62] Krueger, F. (2017). Trim Galore!
- 656 [63] Li, H., Handsaker, B., Wysoker, A., Fennell, T., Ruan, J., Homer, N., et al. (2009). The Sequence  
657 Alignment/Map format and SAMtools. *Bioinformatics*, 25(16):2078–2079.
- 658 [64] Sherry, S. T., Ward, M.-H., Kholodov, M., Baker, J., Phan, L., Smigielski, E. M., and Sirotkin, K.  
659 (2001). dbSNP: the NCBI database of genetic variation. *Nucleic Acids Research*, 29(1):308–311.
- 660 [65] Song, Q., Decato, B., Hong, E. E., Zhou, M., Fang, F., Qu, J., et al. (2013). A reference methylome  
661 database and analysis pipeline to facilitate integrative and comparative epigenomics. *PLOS ONE*, 8(12):1–9.
- 662 [66] Durinck, S., Moreau, Y., Kasprzyk, A., Davis, S., De Moor, B., Brazma, A., and Huber, W. (2005).  
663 BioMart and Bioconductor: a powerful link between biological databases and microarray data analysis.  
664 *Bioinformatics*, 21:3439–3440.
- 665 [67] Durinck, S., Spellman, P. T., Birney, E., and Huber, W. (2009). Mapping identifiers for the integration  
666 of genomic datasets with the R/Bioconductor package biomaRt. *Nature Protocols*, 4:1184–1191.
- 667 [68] Court, F., Tayama, C., Romanelli, V., Martin-Trujillo, A., Iglesias-Platas, I., Okamura, K., et al. (2014).  
668 Genome-wide parent-of-origin DNA methylation analysis reveals the intricacies of human imprinting and  
669 suggests a germline methylation-independent mechanism of establishment. *Genome Research*, 24(4):554–  
670 569.
- 671 [69] Pervjakova, N., Kasela, S., Morris, A. P., Kals, M., Metspalu, A., Lindgren, C. M., et al. (2016).  
672 Imprinted genes and imprinting control regions show predominant intermediate methylation in adult  
673 somatic tissues. *Epigenomics*, 8(6):789–799.
- 674 [70] Smyth, G. K. (2004). Linear models and empirical bayes methods for assessing differential expression in  
675 microarray experiments. *Statistical Applications in Genetics and Molecular Biology*, 3(1):1–25.
- 676 [71] Sonesson, C. and Robinson, M. D. (2016). iCOBRA: open, reproducible, standardized and live method  
677 benchmarking. *Nature Methods*, 13:283.
